# Supplementary material for: TRIM28 SUMOylates and stabilizes NLRP3 to facilitate inflammasome activation
Source: PubMed Central journal article supplement (PMC8352945; doi:10.1038/s41467-021-25033-4), 2021-08-09
Supplement: 41467_2021_25033_MOESM1_ESM.pdf [file 41467_2021_25033_MOESM1_ESM.pdf]

Supplementary Information for

**TRIM28 SUMOylates and stabilizes NLRP3 to facilitate inflammasome activation**

Ying Qin<sup>1</sup>, Qi Li<sup>1</sup>, Wenbo Liang<sup>1</sup>, Rongzhen Yan<sup>1</sup>, Li Tong<sup>1</sup>, Mutian Jia<sup>1</sup>, Chunyuan Zhao<sup>1,2</sup>,  
and Wei Zhao<sup>1,\*</sup>

<sup>1</sup>Department of Pathogenic Biology and Key Laboratory of Infection and Immunity of Shandong Province, School of Basic Medical Science, Cheeloo College of Medicine, Shandong University, Jinan, Shandong, China

<sup>2</sup>Department of Cell Biology, School of Basic Medical Science, Cheeloo College of Medicine, Shandong University, Jinan, Shandong, China

\*Correspondence: wzhao@sdu.edu.cn (W.Z.)

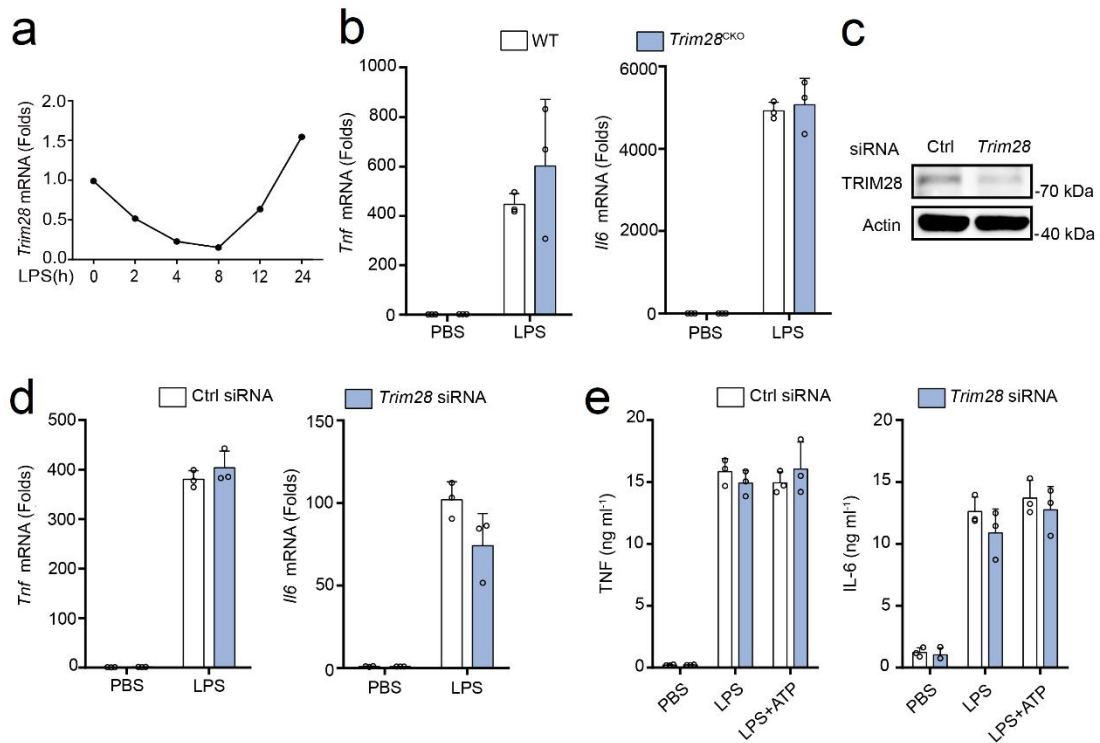

**Supplementary Figure. 1 *Trim28* knockdown has no effects on NLRP3 inflammasome priming.**

(a) RT-PCR analysis of *Trim28* mRNA in LPS-stimulated mouse PMs. (b, d) RT-PCR analysis of *Tnf* and *Il6* mRNA in LPS stimulated mouse PMs from WT or *Trim28*<sup>CKO</sup> mice (b) or PMs transfected with Ctrl siRNA or *Trim28* siRNA (d). (c) Immunoblot analysis of TRIM28 expression in mouse PMs transfected with control (Ctrl) siRNA or *Trim28* siRNA for 48h. (e) ELISA analysis of TNF and IL-6 in supernatants from mouse PMs transfected with Ctrl siRNA or *Trim28* siRNA for 48h, following priming with LPS for 7 h and subsequent stimulation with ATP for 1h. All data are represented as means  $\pm$  SD in b-d. Similar results were obtained from three independent experiments.

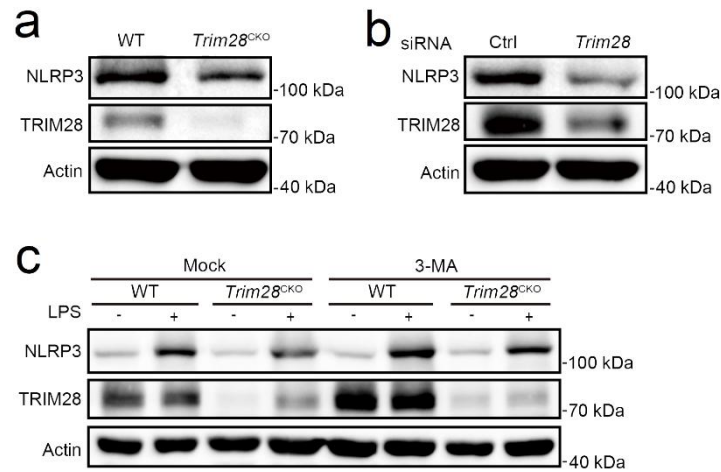

**Supplementary Figure. 2 TRIM28 enhances NLRP3 expression.**

(a, b) Immunoblot analysis of lysates of mouse PMs from WT or *Trim28<sup>CKO</sup>* mice, or PMs transfected with Ctrl siRNA or *Trim28* siRNA for 48h. (c) Immunoblot analysis of NLRP3 expression in mouse PMs from WT or *Trim28<sup>CKO</sup>* mice primed with LPS for 4h and then treated with 3-MA (10 mM) for 40min. Similar results were obtained from three independent experiments.

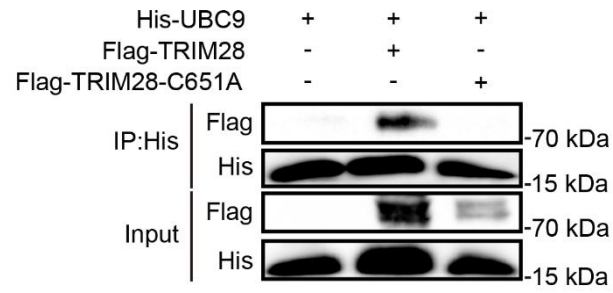

**Supplementary Figure. 3 TRIM28 interacts with UBC9.**

IP analysis of the interaction between UBC9 and TRIM28 in HEK293T cells transfected with His-UBC9, together with Flag-TRIM28 WT or C651A. Similar results were obtained from three independent experiments.

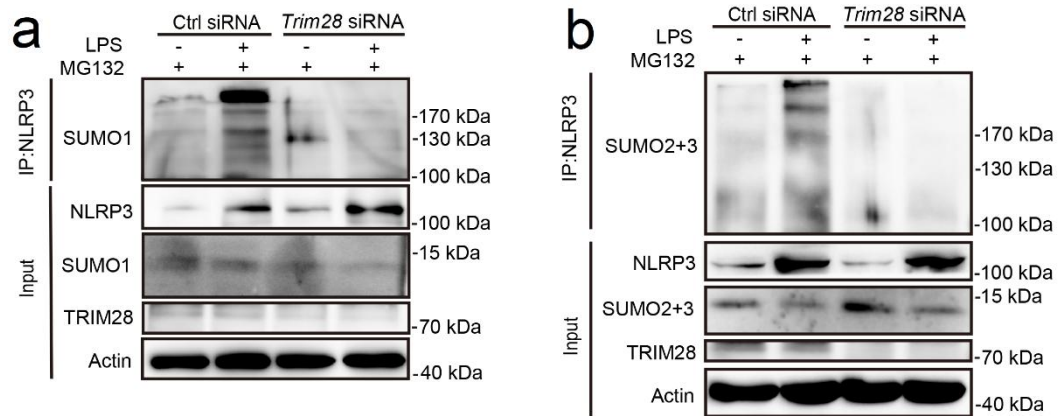

**Supplementary Figure. 4 *Trim28* knockdown inhibits NLRP3 SUMOylation.**

Immunoblot analysis of lysates from mouse peritoneal macrophages transfected with Ctrl siRNA or *Trim28* siRNAs for 48h, primed with LPS for 4h, together with MG132 (10  $\mu$ M) treatment for 4h, and followed by SUMOylation assays with NLRP3 antibody. Similar results were obtained from three independent experiments.

**Supplementary Table 1 Sequences of PCR primers used in this study**

| <b>Name</b>    | <b>Prime</b> | <b>Sequence</b>              |
|----------------|--------------|------------------------------|
| <i>mActb</i>   | Forward      | 5'-TGTTACCAACTGGGACGACA-3'   |
|                | Reverse      | 5'-CTGGGTCATCTTTTCACGGT-3'   |
| <i>mNlrp3</i>  | Forward      | 5'-TGGATGGGTTTGCTGGGAT-3'    |
|                | Reverse      | 5'-CTGCGTGTAGCGACTGTTGAG-3'  |
| <i>mI1b</i>    | Forward      | 5'-ACCTTCCAGGATGAGGACATGA-3' |
|                | Reverse      | 5'-AACGTCACACACCAGCAGGTTA-3' |
| <i>mTnf</i>    | Forward      | 5'-GCCACCACGCTCTTCTGTCT-3'   |
|                | Reverse      | 5'-TGAGGGTCTGGGCCATAGAAC-3'  |
| <i>mI16</i>    | Forward      | 5'-ACAACCACGGCCTTCCCTAC-3'   |
|                | Reverse      | 5'-CATTTCCACGATTTCCAG-3'     |
| <i>mTrim28</i> | Forward      | 5'-CACACTCACCTGCCGCGA-3'     |
|                | Reverse      | 5'-TCAACCTGCACTCGCTTCTG-3'   |
